# Supplementary material
Source: HighWire-hosted journal article supplement (http://www.cmaj.ca/highwire/filestream/80273/field_highwire_adjunct_files/3/210053-res-4-at.pdf)

Appendix 4

**Supplementary Figure S1. Investigator Assignment of Cases into COVID-19, Incidental SARS-CoV-2, Isolation/Infection Control, or Social/Compassionate Categories**

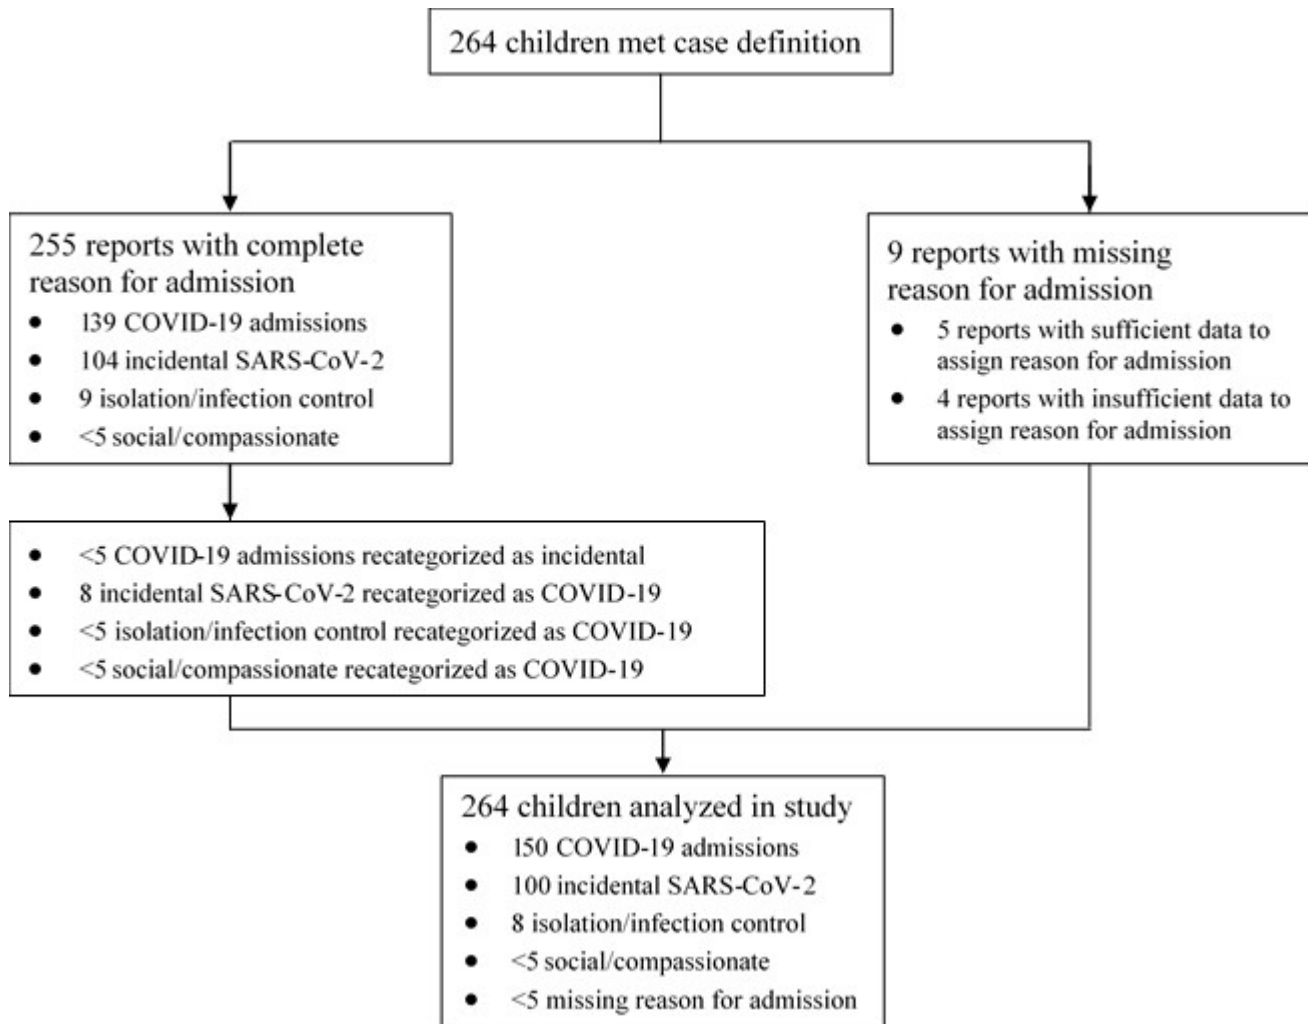

Supplement: 210053-res-4-at.pdf [file 210053-res-4-at.pdf]
